# Supplementary material for: Polymer solar cells based on D–A low bandgap copolymers containing fluorinated side chains of thiadiazoloquinoxaline acceptor and benzodithiophene donor units
Source: Royal Society of Chemistry journal article supplement (doi:10.1039/c7nj03981f), 2017-12-20
Supplement: c7nj03981f1.pdf [file c7nj03981f1.pdf]

## Supplementary information

### Polymer Solar cells based on D-A Low Bandgap Copolymers Containing Fluorinated Side Chains of Thiadiazoloquinoxaline Acceptor and Benzodithiophene Donor Units

*M. L. Keshtov<sup>a\*</sup>, S. A. Kuklin<sup>a</sup>, A. R. Khokhlov<sup>a</sup>, I. O. Konstantinov<sup>a</sup>, N.V. Nekrasova<sup>b</sup>, Zhiyuan Xie<sup>c</sup>, Subhayan Biswas<sup>d</sup>, Ganesh. D. Sharma<sup>d\*</sup>*

<sup>a</sup>*Institute of Organoelement Compounds of the Russian Academy of Sciences, Vavilova St., 28, 119991 Moscow, Russian Federation*

<sup>b</sup>*Institute of physical chemistry and electrochemistry of the Russian Academy of Sciences, LeninskyProspect, 31, 119071, Moscow, Russian Federation*

<sup>c</sup>*State Key Laboratory of Polymer Physics and Chemistry, Changchun Institute of Applied Chemistry, Chinese Academy of Sciences, Changchun 130022, P. R. China.*

<sup>d</sup>*Department of Physics, The LNM Institute for Information Technology, Jamdoli, Jaipur*

#### 1.0 Experimental section

##### 1.1. General characterization methods

##### 1.2. Synthesis

All the chemical reagents were obtained from Sigma-Aldrich. Toluene was freshly dried over sodium and benzophenone prior to use. Monomers M1 [1], M2 [2], M3 [3], and M4 [4] were synthesized according to previously reported procedures.

**Polymer P0F:** Monomer **M1** (0.6738g, 0.5mmol) and monomer **M4** (0.4523g, 0.5mmol) were added into a 25 mL flask equipped with a condenser under argon atmosphere. 16mL toluene was added the mixture was degassed for 30min followed by addition of Pd(Ph<sub>3</sub>P)<sub>4</sub> (0.027g, 0.040mmol in dry box). Solution was heated at 110°C for 48h. Then cooling to room temperature polymer solution was poured into vigorously stirred methanol. Next obtained polymer was purified by Soxhlet extraction using methanol, hexane to remove oligomer and small molecular part, and finally extracted with chloroform. The chloroform solution was then concentrated and precipitated in methanol. Dark colored solid was collected and dried under vacuum 20h. P0F (yield: 0.71g, 81%). <sup>1</sup>H NMR (400MHz, CDCl<sub>3</sub>): 10.00-6.800 (br, 20H, Ar), 3.12 (br, 4H, CH<sub>2</sub>-Thiophen), 0.25-2.12 (br, 130H, Alk). Anal. Calcd for C<sub>116</sub>H<sub>154</sub>N<sub>4</sub>S<sub>5</sub>, %: C, 78.95; H, 8.80; N, 3.17; S, 9.08. Found, %: C, 78.56; H, 8.56; N, 3.00; S, 8.68.

**Polymer P2F** was prepared by similar way. (yield: 0.70g, 78%). <sup>1</sup>H NMR (400 MHz, CDCl<sub>3</sub>) δ: 10.20-6.80 (br, 18H, Ar), 3.13 (br, 4H, CH<sub>2</sub>-Thiophen), 2.25-0.25 (br, 128 H). <sup>19</sup>F NMR

(CDCl<sub>3</sub>)  $\delta$ :-113.44 (s). Anal. Calcd for C<sub>116</sub>H<sub>152</sub> F<sub>2</sub>N<sub>4</sub>S<sub>5</sub>, %: C, 77.37; H, 8.51; N, 3.11; F, 2.11; S, 8.90. Found, %: C, 77.06; H, 8.37; N, 2.98; F, 1.84; S, 8.63.

**Polymer P4F** was prepared by similar way. (yield: 0.65g, 71%). <sup>1</sup>H NMR (400 MHz, CDCl<sub>3</sub>)  $\delta$ : 10.10-6.50 (br, 16H, Ar), 3.13 (br, 4H, CH<sub>2</sub>-Thiophen), 0.25-2.25 (br, 1126 H). <sup>19</sup>F NMR (CDCl<sub>3</sub>)  $\delta$ :-110.17 (s), 115.34 (s). Anal. Calcd for C<sub>116</sub>H<sub>150</sub>F<sub>4</sub>N<sub>4</sub>S<sub>5</sub>, %: C, 75.85; H, 8.23; N, 3.05; F, 4.14; S, 8.73. Found, %: C, 75.46; H, 8.17; N, 2.85; F, 3.84; S, 8.43.

1. M. L. Keshtov, S. A. Kuklin, N. A. Radychev, A. Y. Nikolaev, E. N. Koukaras, A. Sharma and G. D. Sharma, *RSC Adv.*, 2016, 6, 14893–14908,
2. M. L. Keshtov, S. A. Kuklin, N. A. Radychev, I. E. Ostapov, A. Yu. Nikolaev, I. O. Konstantinov, M. M. Krayushkin, E. N. Koukaras, A. Sharma and G. D. Sharma, *RSC Adv.*, 2016, 6, 71232–71244
3. M. L. Keshtov, I. O. Konstantinov, M. M. Krayushkin, S. A. Kuklin, S. M. Masoud, S. N. Osipov, and A. R. Khokhlov, *Doklady Chemistry*, 2016, Vol. 468, Part 2, pp. 202–207
4. Peng Liu, Kai Zhang, Feng Liu, Yaocheng Jin, Shengjian Liu, Thomas P. Russell, Hin-Lap Yip, Fei Huang, and Yong Cao. *Chem. Mater.* 2014, 26, 3009–3017

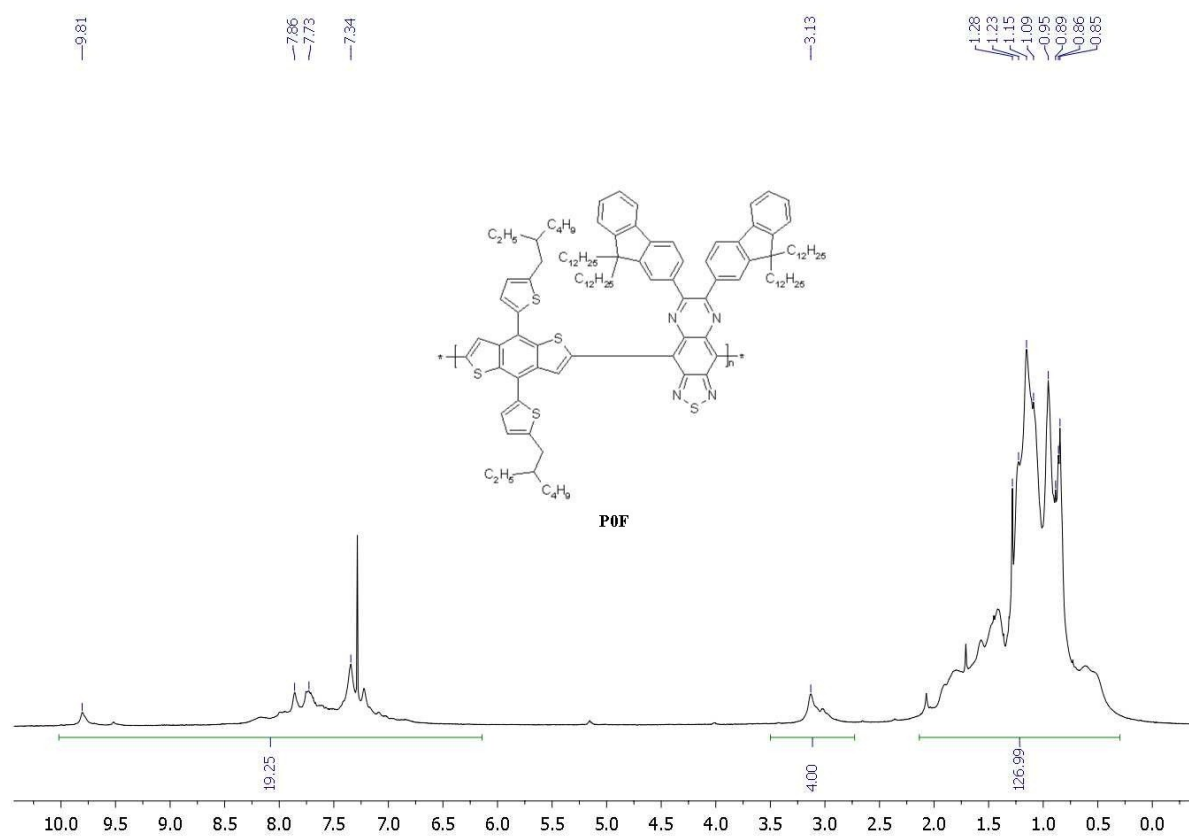

Figure S1  $^1\text{H}$ NMR spectra of copolymer **P0F**

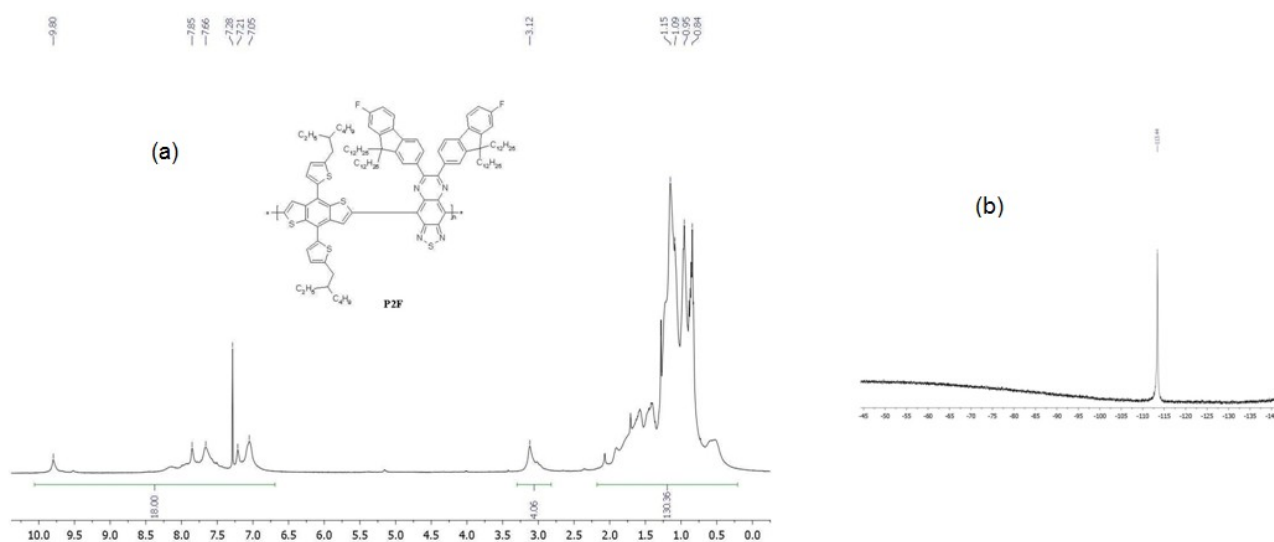

Figure S2  $^1\text{H}$ NMR(a) and  $^{19}\text{F}$  NMR(b) spectra of copolymer **P2F**

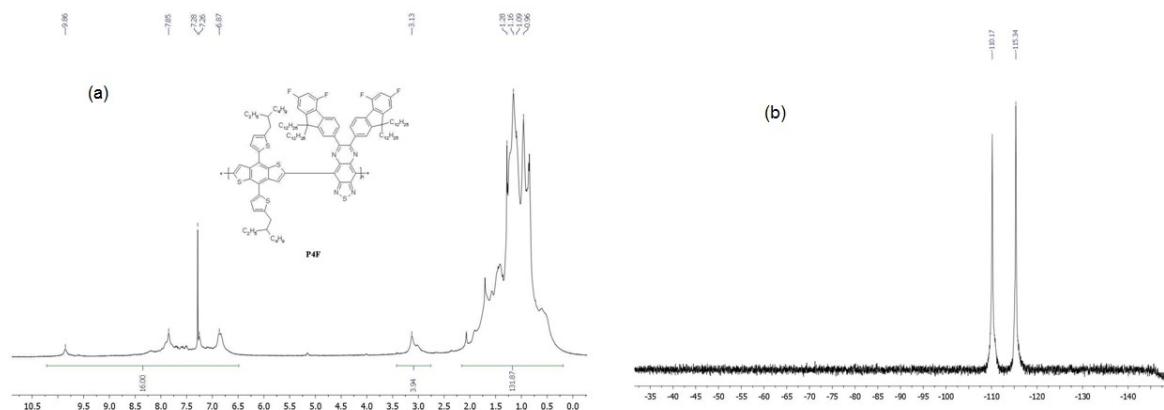

Figure S3  $^1\text{H}$  NMR(a) and  $^{19}\text{F}$  NMR(b) spectra of copolymer **P4F**

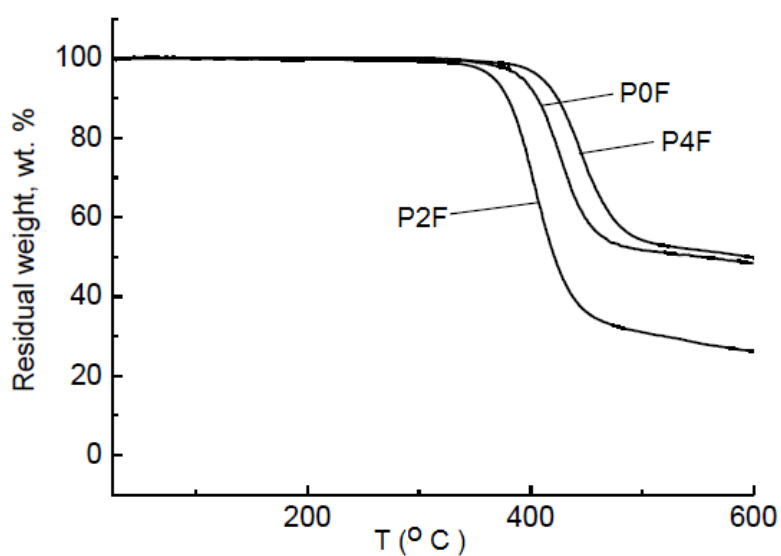

Figure S4 TGA of the copolymers **P0F**, **P2F** and **P4F** with a heating rate of 10  $^{\circ}\text{C}/\text{min}$  under an inert atmosphere.

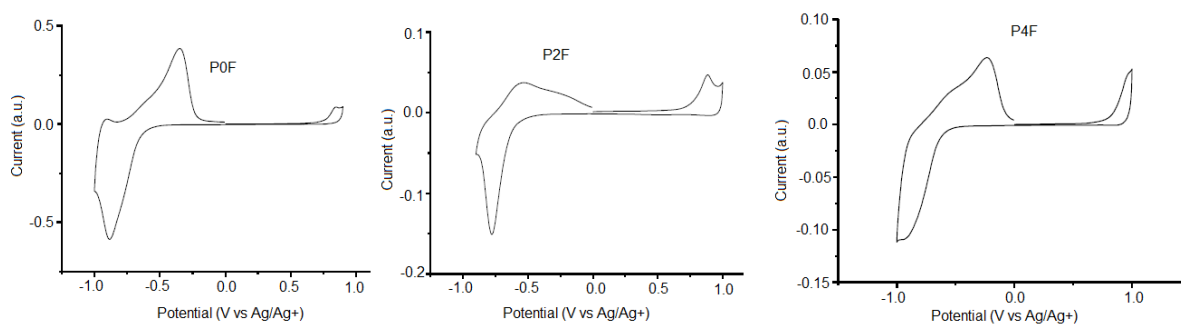

Figure S5 Cyclic voltammograms of copolymers **P0F**, **P2F** and **P4F** in acetonitrile- $[\text{Bu}_4\text{N}]\text{ClO}_4$  at a scan rate 100  $\text{mVs}^{-1}$
